# Supplementary material for: A unique two-phase heterostructure with cubic NiSe2 and orthorhombic NiSe2 for enhanced lithium ion storage and electrocatalysis
Source: Royal Society of Chemistry journal article supplement (doi:10.1039/d2dt01948e), 2022-01-01
Supplement: d2dt01948e1.pdf [file d2dt01948e1.pdf]

## Supporting Information

### **A unique two-phase heterostructure with cubic NiSe<sub>2</sub> and orthorhombic NiSe<sub>2</sub> for enhanced lithium ion storage and electrocatalysis**

Dong Wang<sup>a, b, c\*#</sup>, Li Li<sup>c#</sup>, Zhichao Liu<sup>a\*</sup>, Shanshan Gao<sup>a</sup>, Guangshuai Zhang<sup>a</sup>,  
Yongzhao Hou<sup>a</sup>, Guangwu Wen<sup>a, c</sup>, Lijuan Zhang<sup>a</sup>, Hao Gu<sup>d</sup>, Rui Zhang<sup>a\*</sup>

<sup>a</sup> *School of Materials Science and Engineering, Shandong University of Technology,  
Zibo 255000, P. R. China.*

<sup>b</sup> *State Key Laboratory of Advanced Technology for Float Glass, Bengbu 233000, P.  
R. China.*

<sup>c</sup> *Shangdong Si-Nano Materials Technology Co. Ltd., Zibo 255000, P. R. China.*

<sup>d</sup> *Shanghai Radio Equipment Research Institute, Shanghai 200000, P. R. China.*

\*Corresponding author.

*E-mail address:* wangdong2@sdut.edu.cn (D. Wang); liu690047899@163.com (Z. Liu); zrui0810@163.com (R. Zhang)

#These authors contribute equally to this work as the first authors.

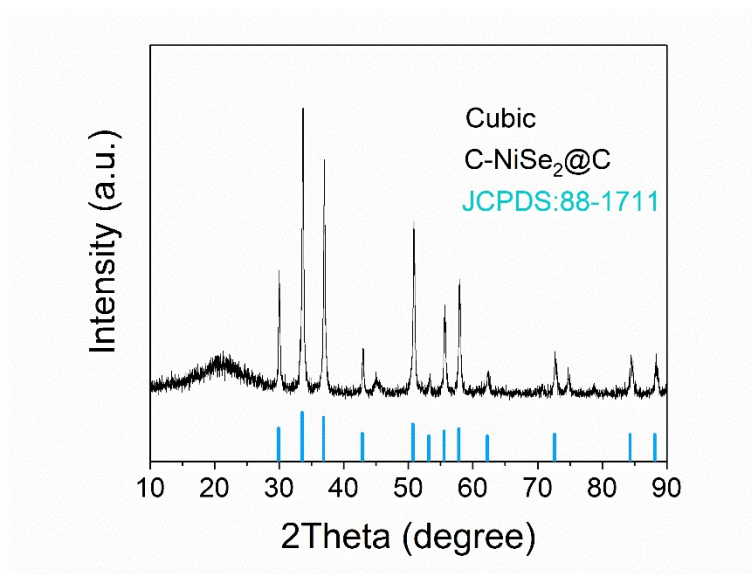

**Fig. S1.** XRD pattern of the C-NiSe<sub>2</sub>@C composites

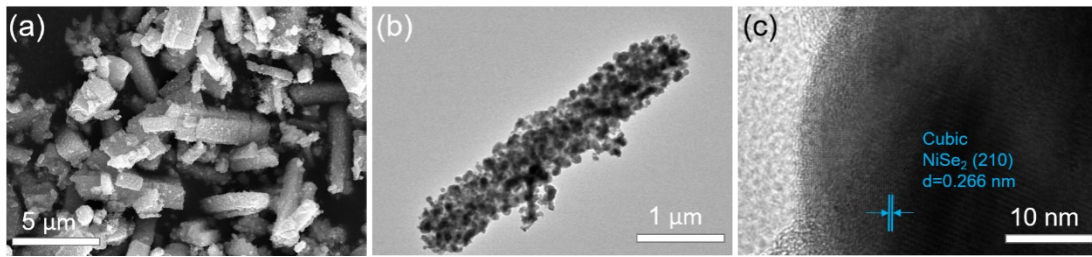

**Fig. S2.** (a) SEM image, (b) TEM image and (c) HRTEM image of the C-NiSe<sub>2</sub>@C composites.

The C-NiSe<sub>2</sub>@C also shows rod-like structure, and the C-NiSe<sub>2</sub> nanoparticles can be observed widely distributed within the carbon skeleton.

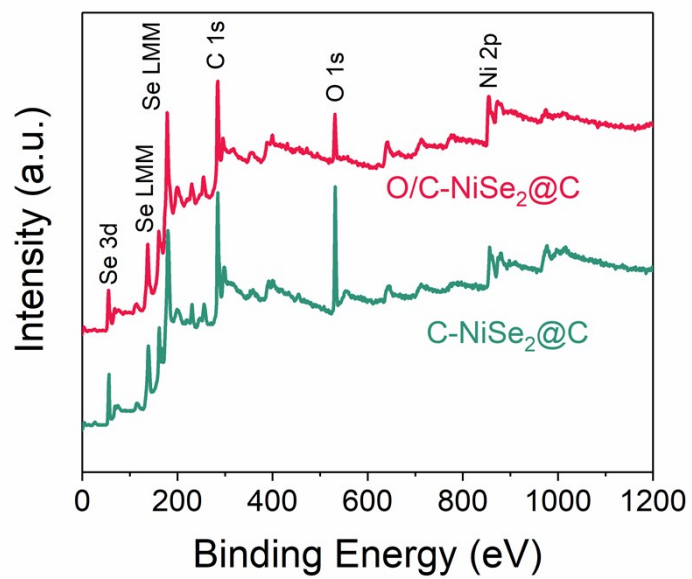

**Fig. S3.** Survey XPS spectra of the O/C-NiSe<sub>2</sub>@C and C-NiSe<sub>2</sub>@C.

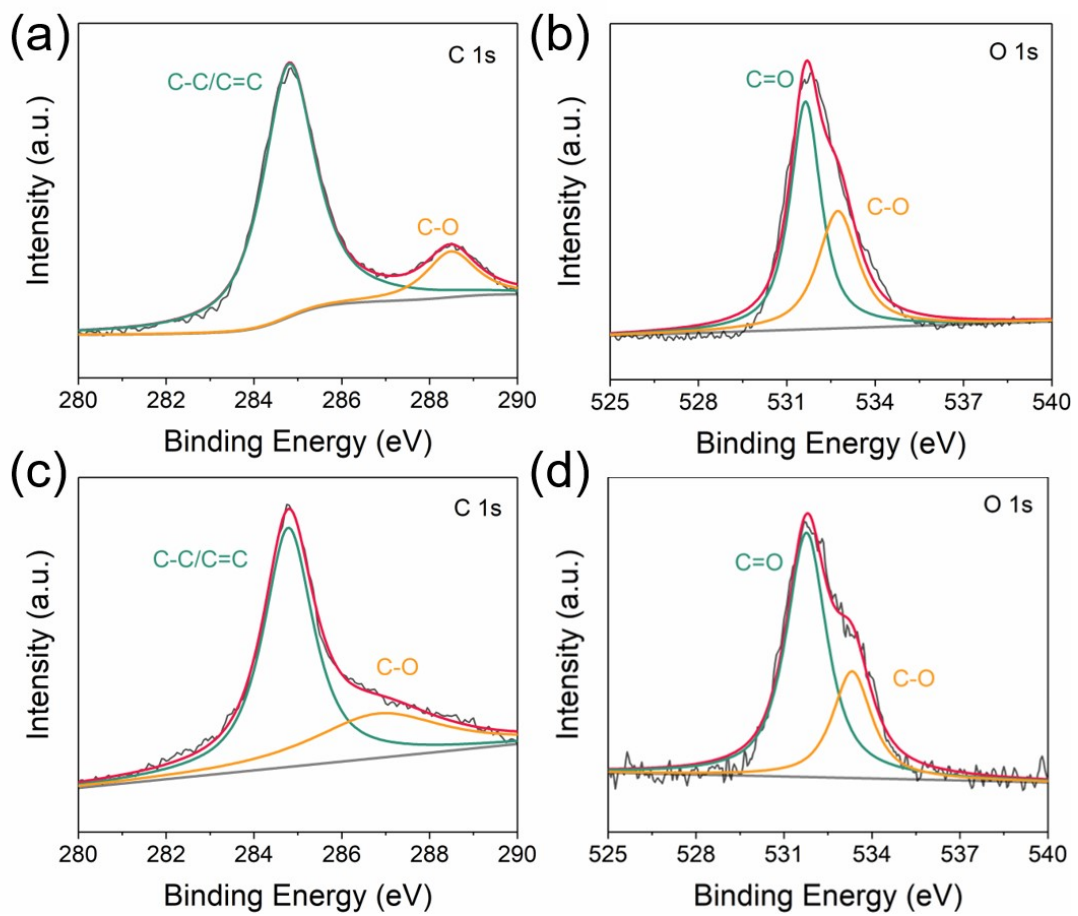

**Fig. S4.** XPS spectra of (a, c) C 1s and (b, d) O 1s for (a, b) O/C-NiSe<sub>2</sub>@C and (c, d) C-NiSe<sub>2</sub>@C.

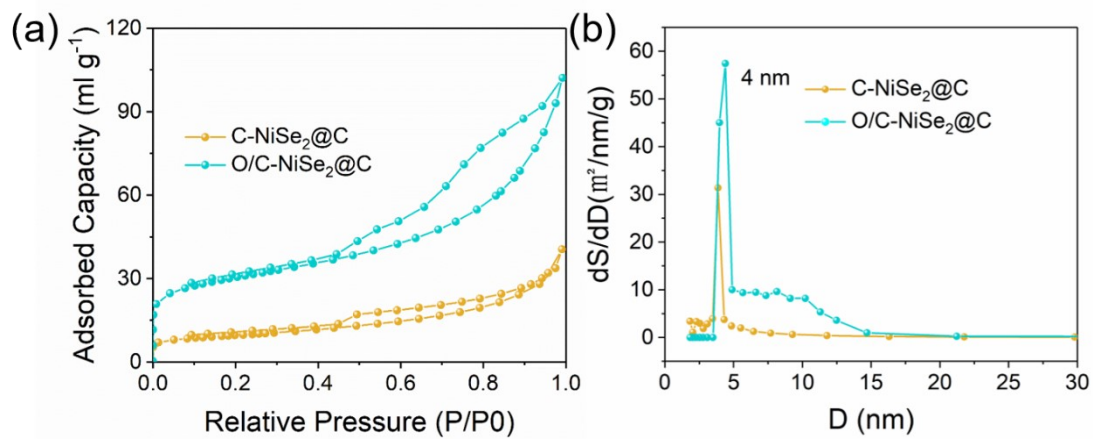

**Fig. S5.** (a)  $N_2$  adsorption-desorption isotherms and (b) corresponding pore size distribution plots of the two samples

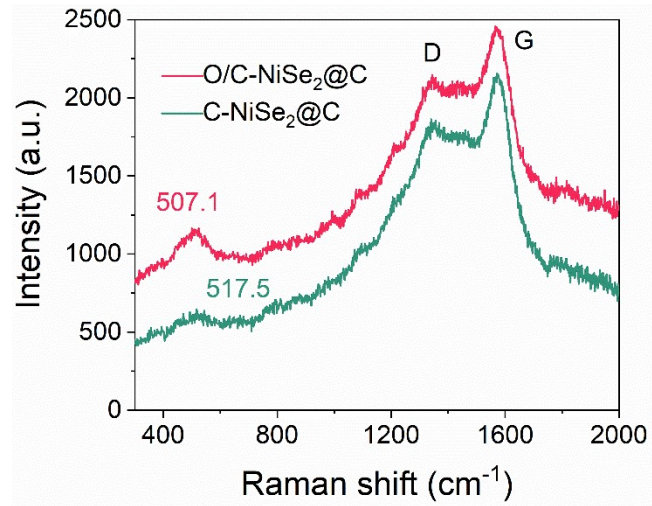

**Fig. S6.** Raman spectra of the O/C-NiSe<sub>2</sub>@C and C-NiSe<sub>2</sub>@C

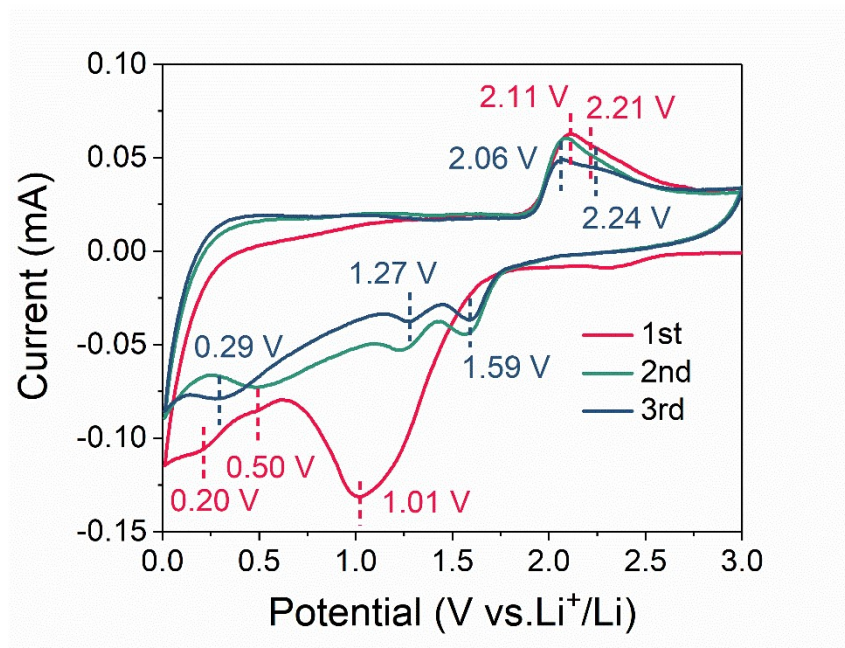

**Fig. S7.** The initial three CV curves of the C-NiSe<sub>2</sub>@C at 0.1 mV s<sup>-1</sup>.



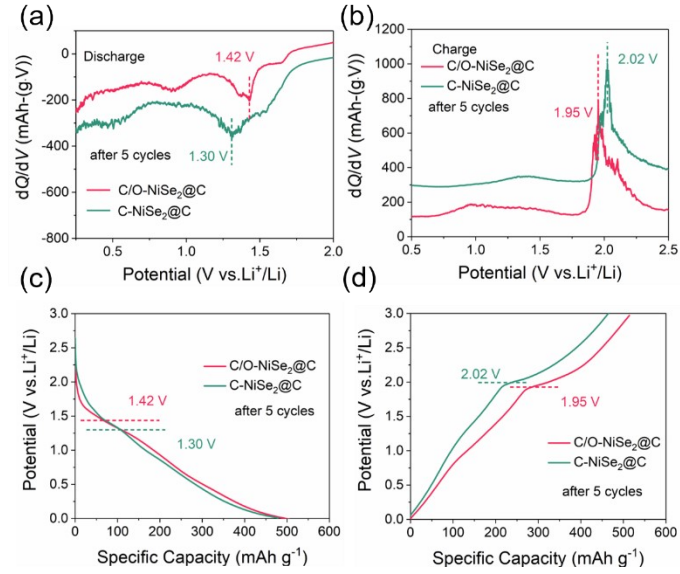

**Fig. S8.** (a, b) Differential capacity and voltage diagram corresponding to the charge/discharge curve of O/C-NiSe<sub>2</sub>@C and C-NiSe<sub>2</sub>@C electrode during (c) discharge and (d) charging processes

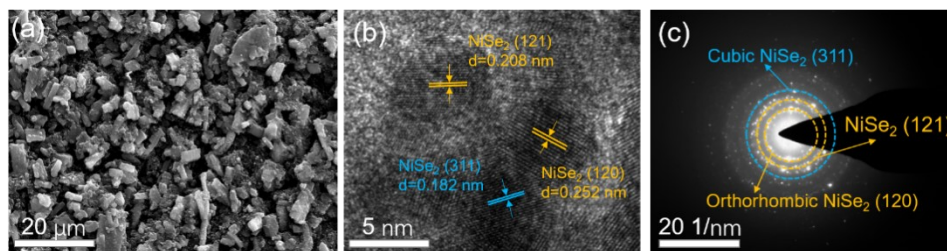

**Fig. S9.** (a) SEM image after 100 cycles of O/C-NiSe<sub>2</sub>@C. (b) Ex-situ HRTEM images and (c) corresponding SAED patterns of the O/C-NiSe<sub>2</sub>@C electrode after the first cycle.

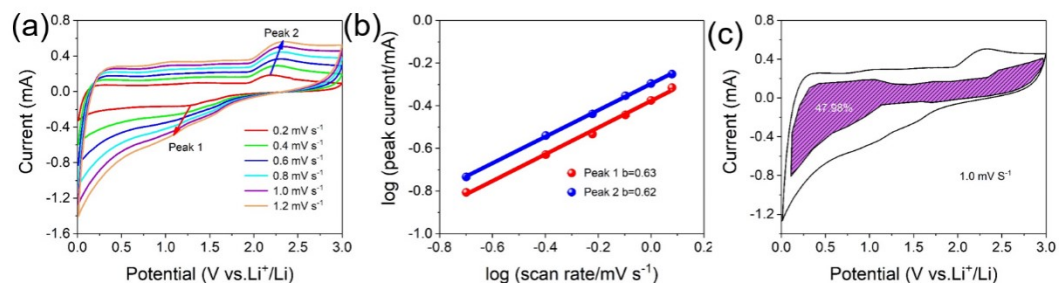

**Fig. S10.** (a) CV curves of C-NiSe<sub>2</sub>@C at various scan rates, (b) the corresponding log(i) versus log(v) plots at different redox peaks, and (c) pseudocapacitive contribution (shaded region) at 1.0 mV s<sup>-1</sup> of C-NiSe<sub>2</sub>@C.

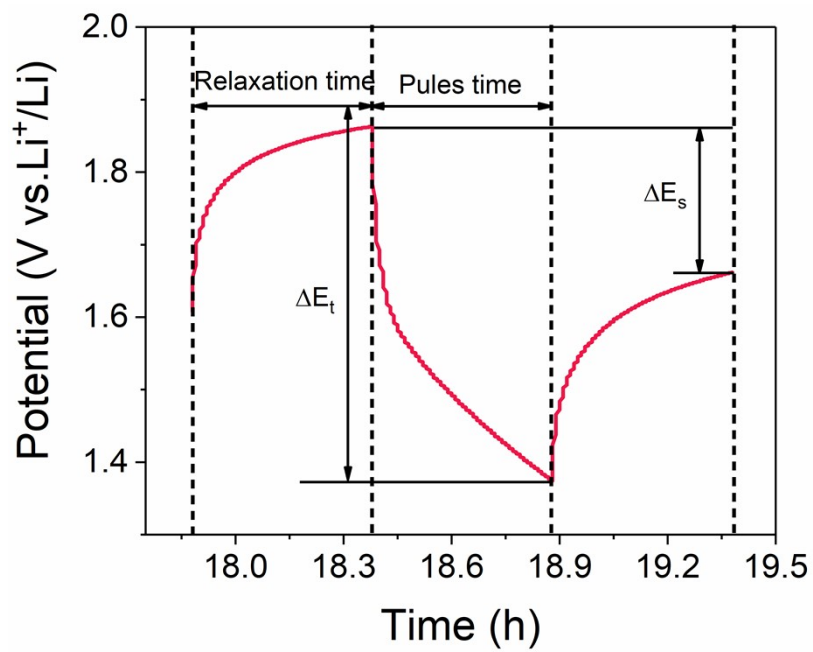

**Fig. S11.** E vs. t curves of the O/C-NiSe<sub>2</sub>@C electrode for a single GITT during discharge process.

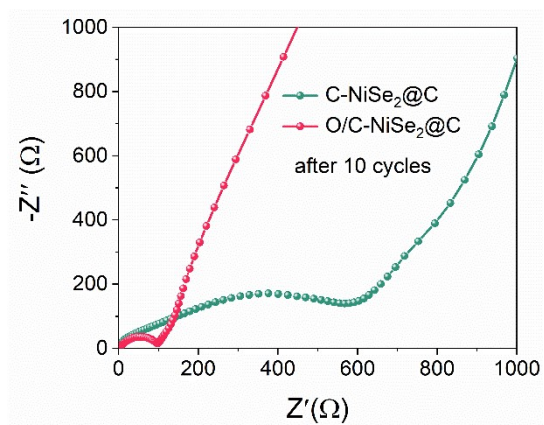

**Fig. S12.** Nyquist plots of O/C-NiSe<sub>2</sub>@C and C-NiSe<sub>2</sub>@C electrodes after 10 cycles.

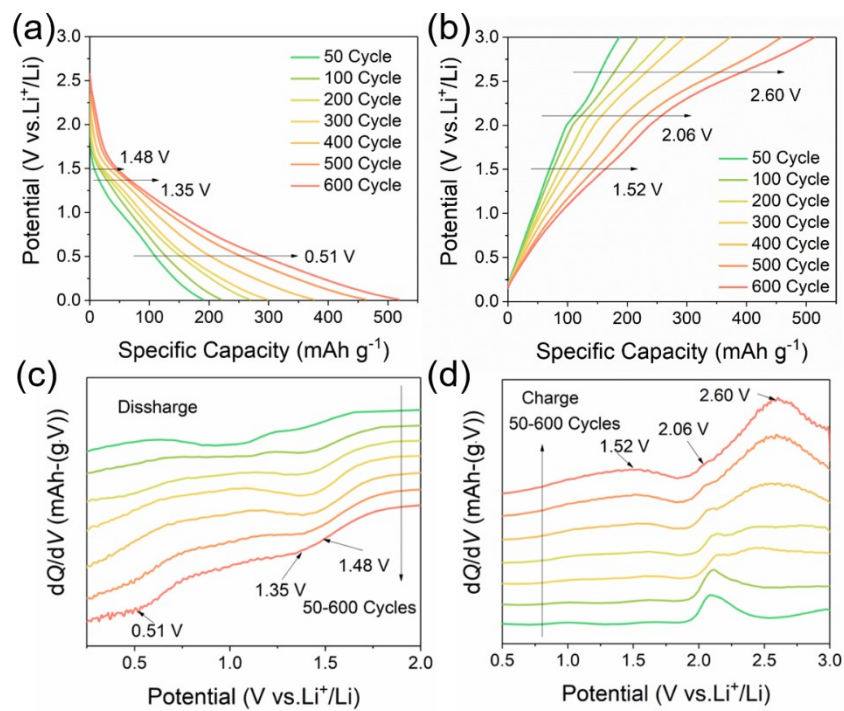

**Fig. S13.** (a, b) Differential capacity and voltage diagram corresponding to the charge/discharge curve of O/C-NiSe<sub>2</sub>@C electrode during (c) discharge and (d) charging processes.
